# Supplementary material
Source: PubMed Central journal article supplement (PMC3811551)
Supplement: AEM.01568-13_zam999104875so1.pdf [file AEM.01568-13_zam999104875so1.pdf]

**Supplemental Tables S1-S2 and Figures S1-S2**

|                                            | <i>Elysia rufescens</i> |      |     | Mucus |      |
|--------------------------------------------|-------------------------|------|-----|-------|------|
|                                            | ER1                     | ER2  | ER3 | M1    | M2   |
| <b>Number of Sequences w/o chloroplast</b> | 4727                    | 9108 | 803 | 6528  | 1539 |
| <b>Number of OTUs</b>                      | 485                     | 650  | 168 | 1551  | 406  |
| <b>Chao Estimator</b>                      | 5339                    | 6961 | 863 | 11605 | 3069 |
| <b>Shannon Indices</b>                     | 1.9                     | 1.6  | 3.1 | 4.1   | 3.9  |
| <b>Good's Coverage Estimator</b>           | 91%                     | 93%  | 83% | 79%   | 77%  |

Table S1. Number of 16S rRNA gene pyrosequences analyzed, the number of OTUs observed, and richness estimators from three individuals of *E. rufescens* and two replicate of its mucus at 3% clustering (distance 0.03).

|                                                    | <i>E. rufescens</i>                                                                                                                                                                                                                                                                                                                                                                                                    |                                                                                                                                                                                                                                                                                                                                                                                                                                              |                                                                                                                                                                                                                                                                                                                                             |
|----------------------------------------------------|------------------------------------------------------------------------------------------------------------------------------------------------------------------------------------------------------------------------------------------------------------------------------------------------------------------------------------------------------------------------------------------------------------------------|----------------------------------------------------------------------------------------------------------------------------------------------------------------------------------------------------------------------------------------------------------------------------------------------------------------------------------------------------------------------------------------------------------------------------------------------|---------------------------------------------------------------------------------------------------------------------------------------------------------------------------------------------------------------------------------------------------------------------------------------------------------------------------------------------|
|                                                    | Isolates & Clones                                                                                                                                                                                                                                                                                                                                                                                                      | Isolates & Pyrosequences                                                                                                                                                                                                                                                                                                                                                                                                                     | Clones & Pyrosequences                                                                                                                                                                                                                                                                                                                      |
| <b>Shared OTUs</b>                                 | 1                                                                                                                                                                                                                                                                                                                                                                                                                      | 2                                                                                                                                                                                                                                                                                                                                                                                                                                            | 5                                                                                                                                                                                                                                                                                                                                           |
| <b>Classification of OTUs</b>                      | <u><i>γ-Proteobacteria</i></u><br><i>Vibrio</i> sp.                                                                                                                                                                                                                                                                                                                                                                    | <u><i>γ-Proteobacteria</i></u><br><i>Vibrio</i> sp.                                                                                                                                                                                                                                                                                                                                                                                          | <u>4 <i>γ-Proteobacteria</i></u><br>2 <i>Vibrio</i> sp.<br><i>Neptunomonas</i> sp.<br><i>Methylophaga</i> sp.<br><u><i>Tenericutes</i></u><br><i>Mycoplasma</i> sp.                                                                                                                                                                         |
|                                                    | <b>Mucus</b>                                                                                                                                                                                                                                                                                                                                                                                                           |                                                                                                                                                                                                                                                                                                                                                                                                                                              |                                                                                                                                                                                                                                                                                                                                             |
|                                                    | Isolates & Clones                                                                                                                                                                                                                                                                                                                                                                                                      | Isolates & Pyrosequences                                                                                                                                                                                                                                                                                                                                                                                                                     | Clones & Pyrosequences                                                                                                                                                                                                                                                                                                                      |
| <b>Shared OTUs</b>                                 | 2                                                                                                                                                                                                                                                                                                                                                                                                                      | 7                                                                                                                                                                                                                                                                                                                                                                                                                                            | 11                                                                                                                                                                                                                                                                                                                                          |
| <b>Classification of OTUs</b>                      | <u>2 <i>γ-Proteobacteria</i></u><br><i>Vibrio</i> sp.                                                                                                                                                                                                                                                                                                                                                                  | <u><i>γ-Proteobacteria</i></u><br>5 <i>Vibrio</i> sp.<br><i>Listonella</i> sp.<br><i>Photobacterium</i> sp.                                                                                                                                                                                                                                                                                                                                  | <u>5 <i>γ-Proteobacteria</i></u><br>3 <i>Vibrio</i> sp.<br><i>Neptunomonas</i> sp.<br><i>Methylophaga</i> sp.<br>2 <u><i>α-Proteobacteria</i></u><br><i>Kiloniella</i> sp.<br><u>2 <i>Spirochaetes</i></u><br><i>Exilispira</i> sp.<br><u><i>Chlamydia</i></u><br><i>Simkania</i> sp.<br><u><i>Tenericutes</i></u><br><i>Mycoplasma</i> sp. |
| <b><i>E. rufescens</i> and Mucus Pyrosequences</b> |                                                                                                                                                                                                                                                                                                                                                                                                                        |                                                                                                                                                                                                                                                                                                                                                                                                                                              |                                                                                                                                                                                                                                                                                                                                             |
| <b>Shared OTUs</b>                                 | 92                                                                                                                                                                                                                                                                                                                                                                                                                     |                                                                                                                                                                                                                                                                                                                                                                                                                                              |                                                                                                                                                                                                                                                                                                                                             |
| <b>Classification of OTUs</b>                      | <u>27 <i>Tenericutes</i></u><br><i>Mycoplasma</i> sp.<br><br><u><i>Epsilonproteobacteria</i></u><br><i>Helicobacter</i> sp.<br><u><i>Actinobacteria</i></u><br><i>Rothia</i> sp.<br><u><i>Chlamydiae</i></u><br><i>Simkania</i> sp.<br><u><i>Betaproteobacteria</i></u><br><i>Neisseria</i> sp.<br><u><i>Fusobacteria</i></u><br><i>Streptobacillus</i> sp.<br><u><i>Chrysiogenetes</i></u><br><i>Chrysiogenes</i> sp. | 20 <u><i>γ-Proteobacteria</i></u><br>8 <i>Vibrio</i> sp.<br>5 <i>Neptunomonas</i> sp.<br>2 <i>Methylophaga</i> sp.<br><i>Teredinibacter</i> sp.<br>2 <i>Celerinatantimonas</i> sp.<br><i>Psychrosphaera</i> sp.<br><i>Cycloclasticus</i> sp.<br><br>13 <u><i>Firmicutes</i></u><br>6 <i>Streptococcus</i> sp.<br>2 <i>Gemella</i> sp.<br>2 <i>Bulleidia</i> sp.<br><i>Oribacterium</i><br><i>Oscillibacter</i> sp.<br><i>Veillonella</i> sp. | 13 <u><i>α-Proteobacteria</i></u><br>8 <i>Kiloniella</i> sp.<br>4 <i>Pseudorhodobacter</i> sp.<br><i>Hellea</i> sp.<br><br>4 <u><i>Bacteroidetes</i></u><br>3 <i>Prevotella</i> sp.<br><i>Anaerorhabdus</i> sp.<br><br>5 <u><i>Spirochaetes</i></u><br>4 <i>Exillispira</i> sp.<br><i>Turneriella</i> sp.                                   |

Table S2. Table summary of classification of shared OTUs between samples at 3% OTUs (distance = 0.03). Phyla and classes are underlined and species names are listed below.

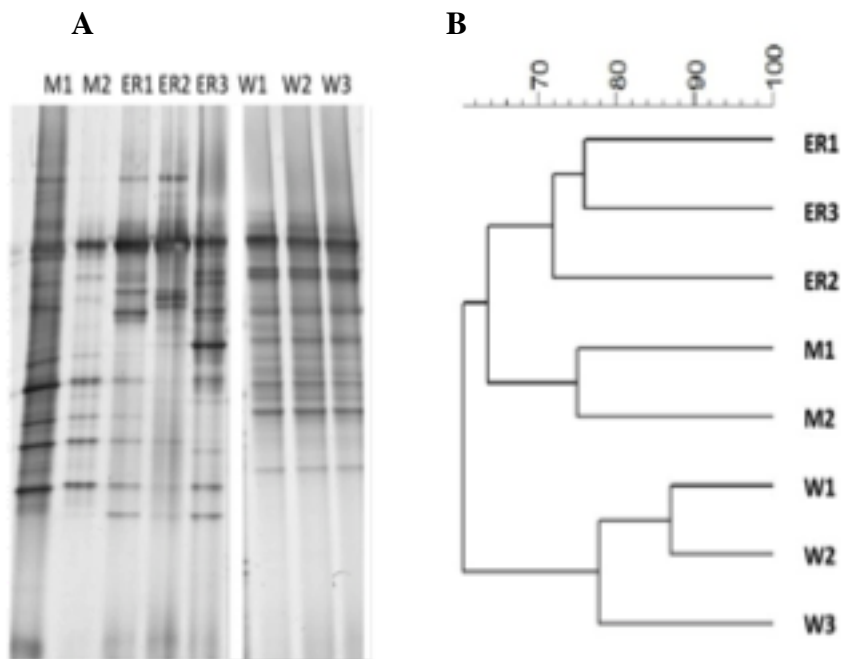

Figure S1. Bionumeric analysis of Denature Gradient Gel Electrophoresis (DGGE). Shown are the DGGE fingerprints of the bacterial communities associated with *E. rufescens* (ER1-ER3), secreted mucus from *E. rufescens* (M1, M2), and surrounding seawater samples (W1-W3) (A). UPGMA dendrogram showing clustering of normalized DGGE (B).

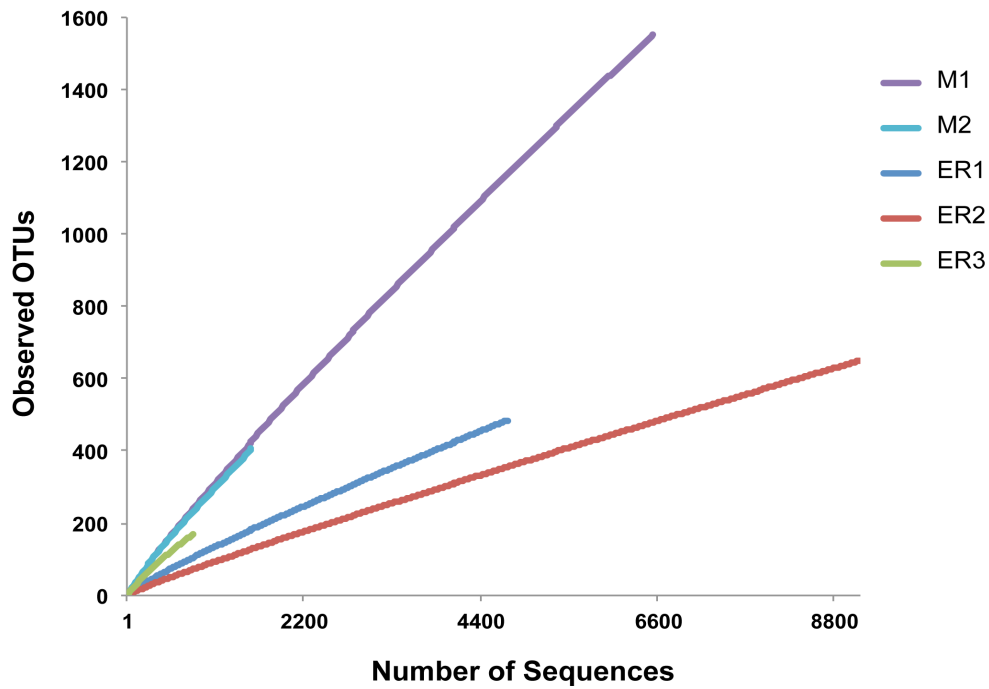

Figure S2. Rarefaction curves for *E. rufescens* and its mucus. Shown are rarefaction curves for the 16S rRNA gene sequences from *E. rufescens* (ER1, ER2, ER3) and secreted mucus from *E. rufescens* (M1 and M2) at the 3% OTUs (distance = 0.03).
